# Supplementary material for: Unravelling the efficient catalytic performance of ozone decomposition over nitrogen-doped manganese oxide catalysts under high humidity
Source: Royal Society of Chemistry journal article supplement (doi:10.1039/d0nj04393a), 2020-01-01
Supplement: d0nj04393a1.pdf [file d0nj04393a1.pdf]

## Supporting Information

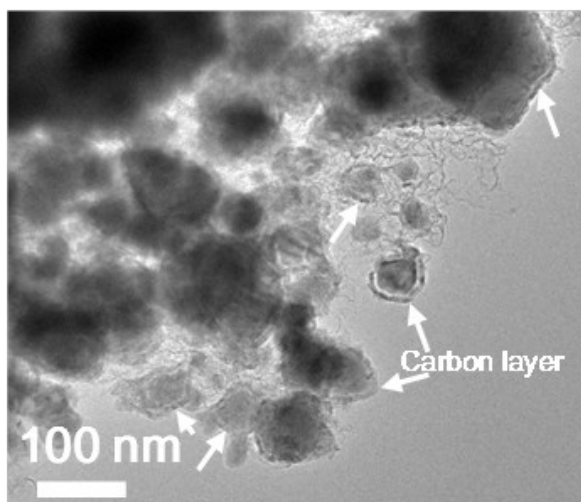

**Figure S1.** The TEM picture of MnO-Mn<sub>2</sub>N<sub>0.86</sub>@C-850 catalyst.

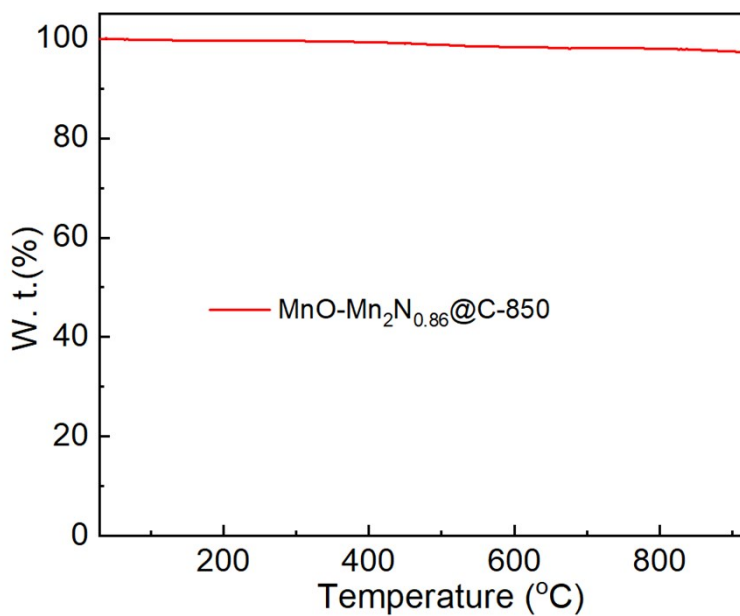

**Figure S2.** The thermogravimetric analysis of MnO-Mn<sub>2</sub>N<sub>0.86</sub>@C catalysts under nitrogen atmosphere.

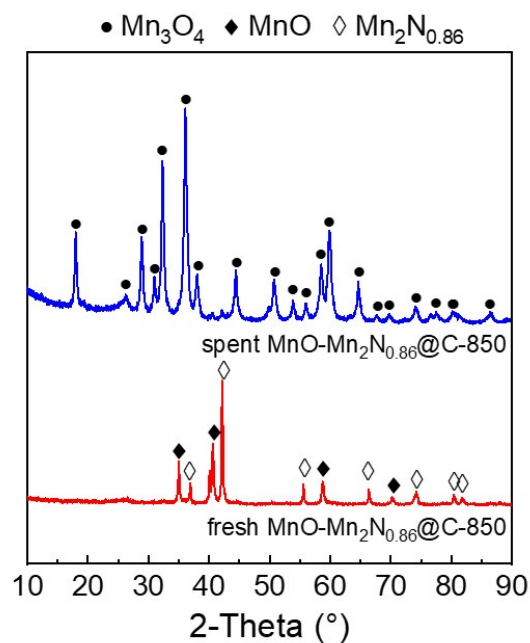

**Figure S3.** The XRD patterns of fresh MnO-Mn<sub>2</sub>N<sub>0.86</sub>@C-850 and spent MnO-Mn<sub>2</sub>N<sub>0.86</sub>@C-850 after reaction of 36 hours.

**Table S1.** The chemical states of oxygen and manganese on the surface of MnO-Mn<sub>3</sub>O<sub>4</sub>@C and MnO-Mn<sub>2</sub>N<sub>0.86</sub>@C catalysts.

| Catalysts                                    | O species          |                    |                    | Mn species           |                      |
|----------------------------------------------|--------------------|--------------------|--------------------|----------------------|----------------------|
|                                              | O <sub>a</sub> (%) | O <sub>b</sub> (%) | O <sub>c</sub> (%) | Mn <sup>2+</sup> (%) | Mn <sup>3+</sup> (%) |
| MnO-Mn <sub>3</sub> O <sub>4</sub> @C-550    | 49.2               | 31.0               | 19.8               | 29.9                 | 70.1                 |
| MnO-Mn <sub>3</sub> O <sub>4</sub> @C-650    | 57.4               | 34.8               | 7.8                | 26.2                 | 73.8                 |
| MnO-Mn <sub>2</sub> N <sub>0.86</sub> @C-750 | 50.7               | 31.7               | 17.6               | 19.6                 | 80.4                 |
| MnO-Mn <sub>2</sub> N <sub>0.86</sub> @C-850 | 41.7               | 39.6               | 18.7               | 8.1                  | 91.9                 |

<sup>a</sup> The chemical states were obtained from XPS result.

**Table S2.** The stability comparison of MnO-Mn<sub>2</sub>N<sub>0.86</sub>@C-850 with reported works.

| Catalysts                                    | O <sub>3</sub> (ppm) | T (°C) | RH (%) | Reaction time (h) | O <sub>3</sub> conversion (%) | Ref.      |
|----------------------------------------------|----------------------|--------|--------|-------------------|-------------------------------|-----------|
| MnO-Mn <sub>2</sub> N <sub>0.86</sub> @C-850 | 23                   | 20     | 90     | 6                 | 100                           | This work |
| CeMn <sub>10</sub> O <sub>x</sub>            | 40                   | 30     | 65     | 6                 | 96                            | 1         |
| MIL-100(Fe)                                  | 45                   | 25     | 90     | 12                | 100                           | 2         |
| Cu <sub>2</sub> O/rGO                        | 20                   | 25     | 80     | 10                | 98                            | 3         |
| Ag-MnO <sub>x</sub> -H                       | 40                   | 25     | 60     | 6                 | 90                            | 4         |
| OMS-2-Ac                                     | 40                   | 30     | 90     | 6                 | 80                            | 5         |
| Ce-OMS-2                                     | 40                   | 25     | 90     | 6                 | 90                            | 6         |
| 8%AgMnO <sub>x</sub>                         | 40                   | 30     | 65     | 6                 | 81                            | 7         |
| V-MnO <sub>2</sub>                           | 110                  | 25     | 55     | 5                 | 50                            | 8         |
| Ni/NiO pH-1                                  | 1000                 | 25     | 90     | 8                 | 98                            | 9         |
| S-300 (MnO <sub>x</sub> )                    | 43                   | 25     | 25     | 6                 | 80                            | 10        |
| S-300 (MnO <sub>x</sub> )                    | 43                   | 25     | 50     | 6                 | 65                            | 10        |
| S-300 (MnO <sub>x</sub> )                    | 43                   | 25     | 75     | 6                 | 10                            | 10        |
| 1.1% MnO <sub>x</sub> /AC                    | 43-48                | 25     | 60     | 6                 | 83                            | 11        |

#### Reference

1. J. Ma, X. Lia, C. Zhang, Q. Ma and H. He, *Appl. Catal. B Environ.*, 2020, **264**, 118498. DOI: 10.1016/j.apcatb.2019.118498.
2. H. Wang, P. Rassu, X. Wang, H. Li, X. Wang, X. Wang, X. Feng, A. Yin, P. Li, X. Jin, S. Chen, X. Ma and B. Wang, *Angew. Chem. Int. Ed. Engl.*, 2018, **50**, 16416-16420.
3. S. Gong, J. Chen, X. Wu, N. Han and Y. Chen, *Catal. Commun.*, 2018, **106**, 25-29.
4. H. Deng, S. Kang, J. Ma, L. Wang, C. Zhang and H. He, *Environ. Sci. Technol.*, 2019, **53**, 10871-10879.
5. C. Wang, J. Ma, F. Liu, H. He and R. Zhang, *J. Phys. Chem. C.*, 2015, **119**, 23119-23126.
6. L. Yang, J. Ma, X. Li, C. Zhang and H. He, *Ind. Eng. Chem. Res.*, 2020, **59**, 118-128.
7. X. Li, J. Ma, C. Zhang, R. Zhang and H. He, *J. Environ. Sci.*, 2019, **80**, 159-168.
8. Y. Yang, P. Zhang and J. Jia, *Appl. Surf. Sci.*, 2019, **484**, 45-53.
9. S. Gong, A. Wang, Y. Wang, H. Liu, N. Han and Y. Chen, *ACS Appl. Nano Mater.*, 2020, **3**, 597-607.
10. Y. Liu, P. Zhang, J. Zhan and L. Liu, *Appl. Surf. Sci.*, 2019, **463**, 374-385.

11. M. Wang, P. Zhang, J. Li and C. Jiang, *Chin. J. Catal.*, 2014, **35**, 335-341.
